# Supplementary material for: Senescence caused by telomerase inactivation in myeloid, mesenchymal, and endothelial cells has distinct effects on cancer progression
Source: publisher site journal article supplement (doi:10.18632/aging.206268), 2025-06-05
Supplement: Supplementary file [file aging-v17-206268-supplementary-material-SD1.pdf]

## SUPPLEMENTARY FIGURES

### A *LysM-TERT*

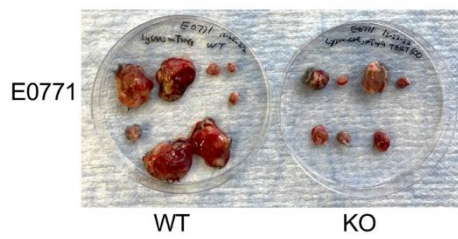

### B *Pdgfrb-TERT*

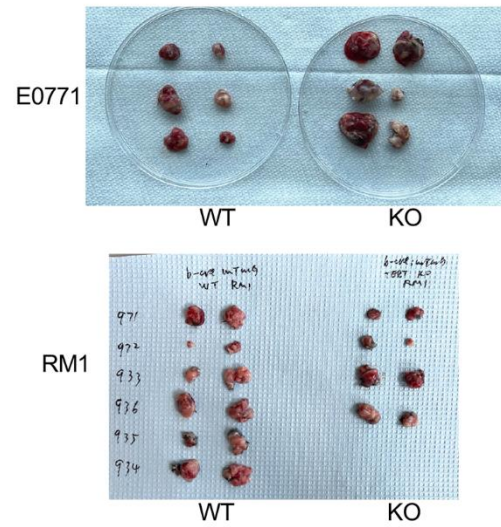

### C *Pdgfra-TERT*

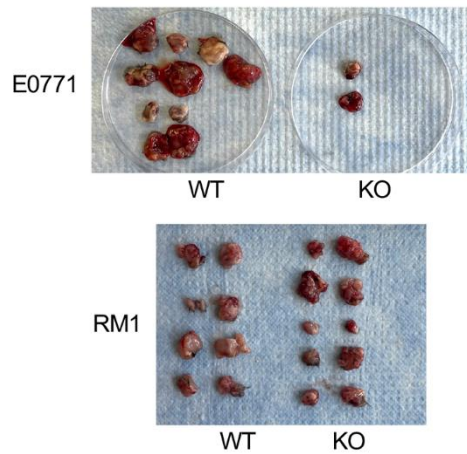

### D *Tie2e-TERT*

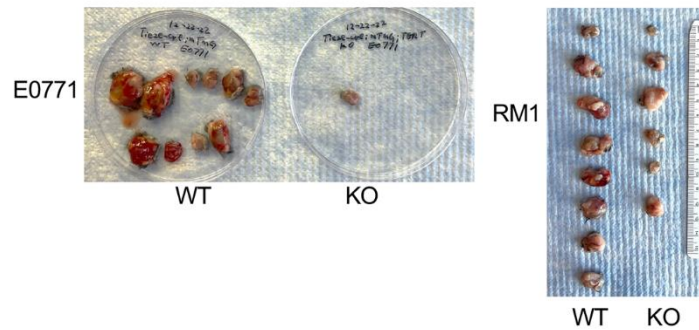

**Supplementary Figure 1. Resected tumors from indicated models. (A)** *LysM-Cre; TERT<sup>fl/fl</sup>* (KO) and *LysM-Cre; TERT<sup>+/+</sup>* (WT). **(B)** *Pdgfra-Cre; TERT<sup>fl/fl</sup>* (KO) and *Pdgfra-Cre; TERT<sup>+/+</sup>* (WT). **(C)** *Pdgfrb-Cre; TERT<sup>fl/fl</sup>* (KO) and *Pdgfrb-Cre; TERT<sup>+/+</sup>* (WT). **(D)** *Tie2e-Cre; TERT<sup>fl/fl</sup>* (KO) and *Tie2e-Cre; TERT<sup>+/+</sup>* (WT). All tumors are up to scale shown in D.

**A** *LysM-TERT*

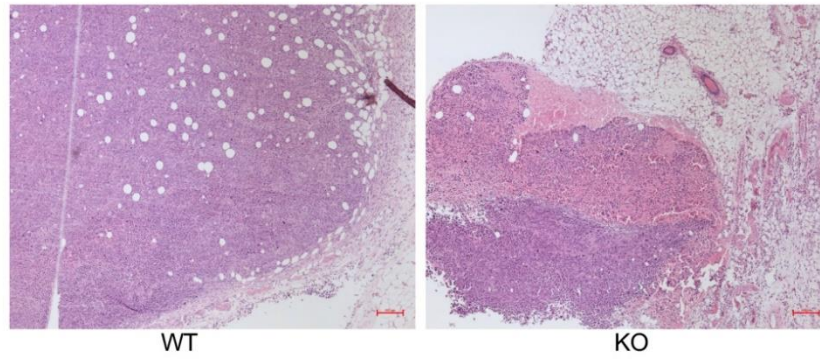

**B** *Pdgfrb-TERT*

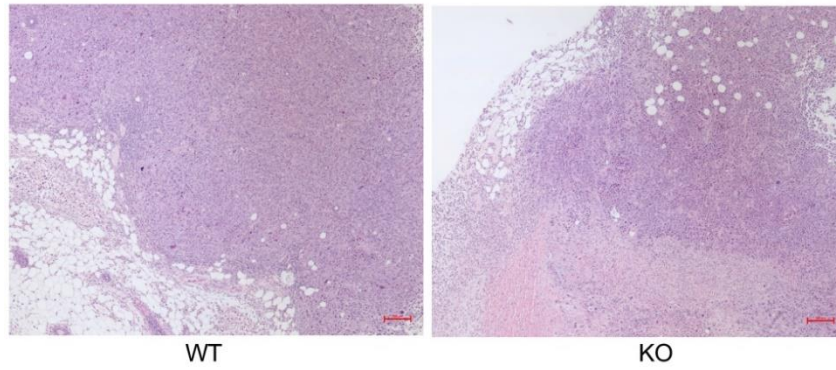

**C** *Pdgfra-TERT*

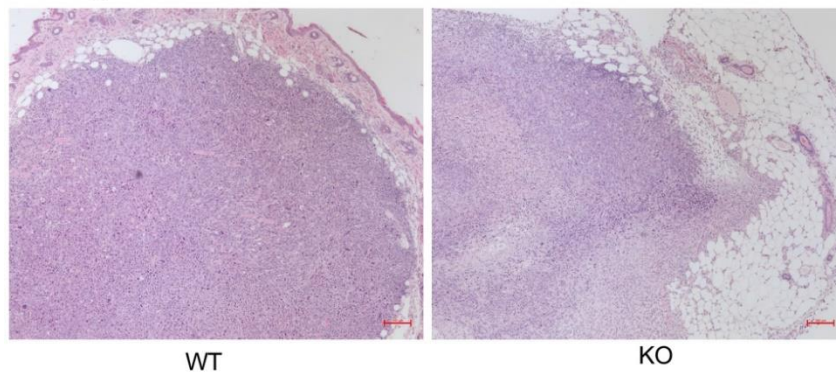

**D** *Tie2e-TERT*

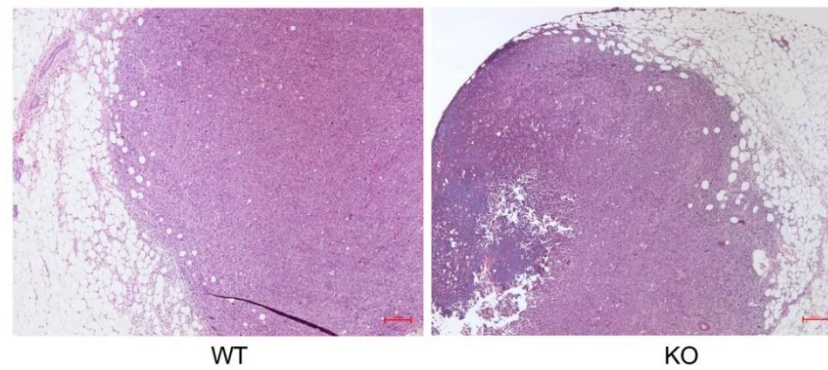

**Supplementary Figure 2.** E0771 tumor sections from indicated models stained with H&E. (A) *LysM-TERT*. (B) *Pdgfrb-TERT*. (C) *Pdgfra-TERT*. (D) *Tie2e-TERT*.



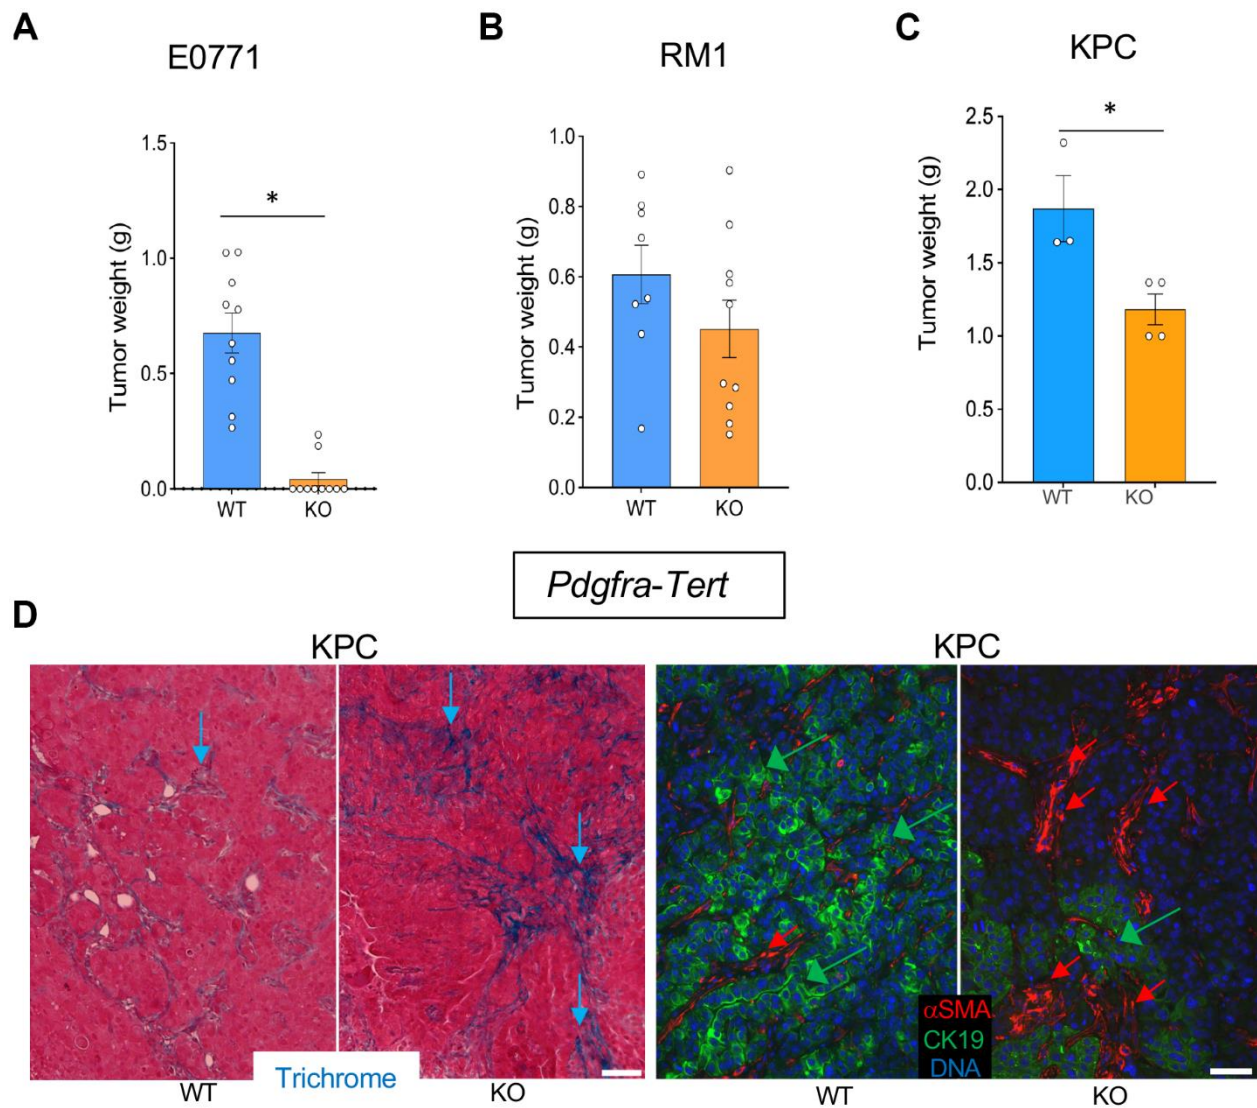

**Supplementary Figure 3. Tert KO in mesenchymal cells suppresses growth of pancreatic tumors.** Tissues resected from *Pdgfra-Cre; TERT<sup>fl/fl</sup>* (KO) and *Pdgfra-Cre; TERT<sup>fl/+</sup>* (WT) littermates were analyzed once one of the groups developed critical tumor burden. **(A)** E0771 tumor weight upon resection. **(B)** RM1 tumor weight upon resection. **(C)** KPC tumor weight upon resection. **(D)** Representative paraffin sections of KPC tumors stained with Trichrome (left) or subjected to CK19 and  $\alpha$ -SMA IF (right) revealing epithelial cells (green arrows) and myofibroblasts (red arrows). Scale bar: 100  $\mu$ m. Shown are mean  $\pm$  SEM, \* $P$ <0.05, Student's t-test.

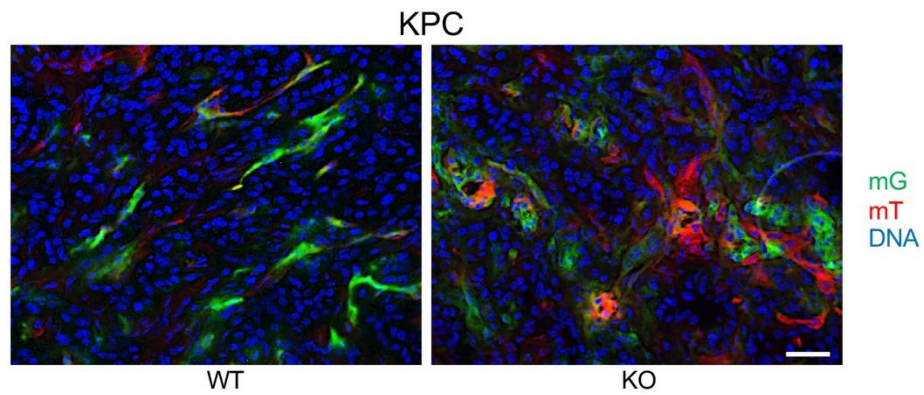

**Supplementary Figure 4. Tert KO in EC results in vasculature dysfunction.** Paraffin sections of representative KPC tumors from Tie2e-Cre; mTmG; TERT<sup>fl/fl</sup> (KO) and Tie2e-Cre; mTmG; TERT<sup>fl/+</sup> (WT) littermates were subjected to GFP and RFP IF. Scale bar: DNA is blue. 100  $\mu$ m.
